# Supplementary material for: Effect of Sea-Level Change on Deep-Sea Sedimentary Records in the Northeastern South China Sea over the past 42 kyr
Source: Hindawi journal article supplement (doi:10.1155/2020/8814545), 2020-10-19
Supplement: f1 [file 8814545.f1.docx]

| 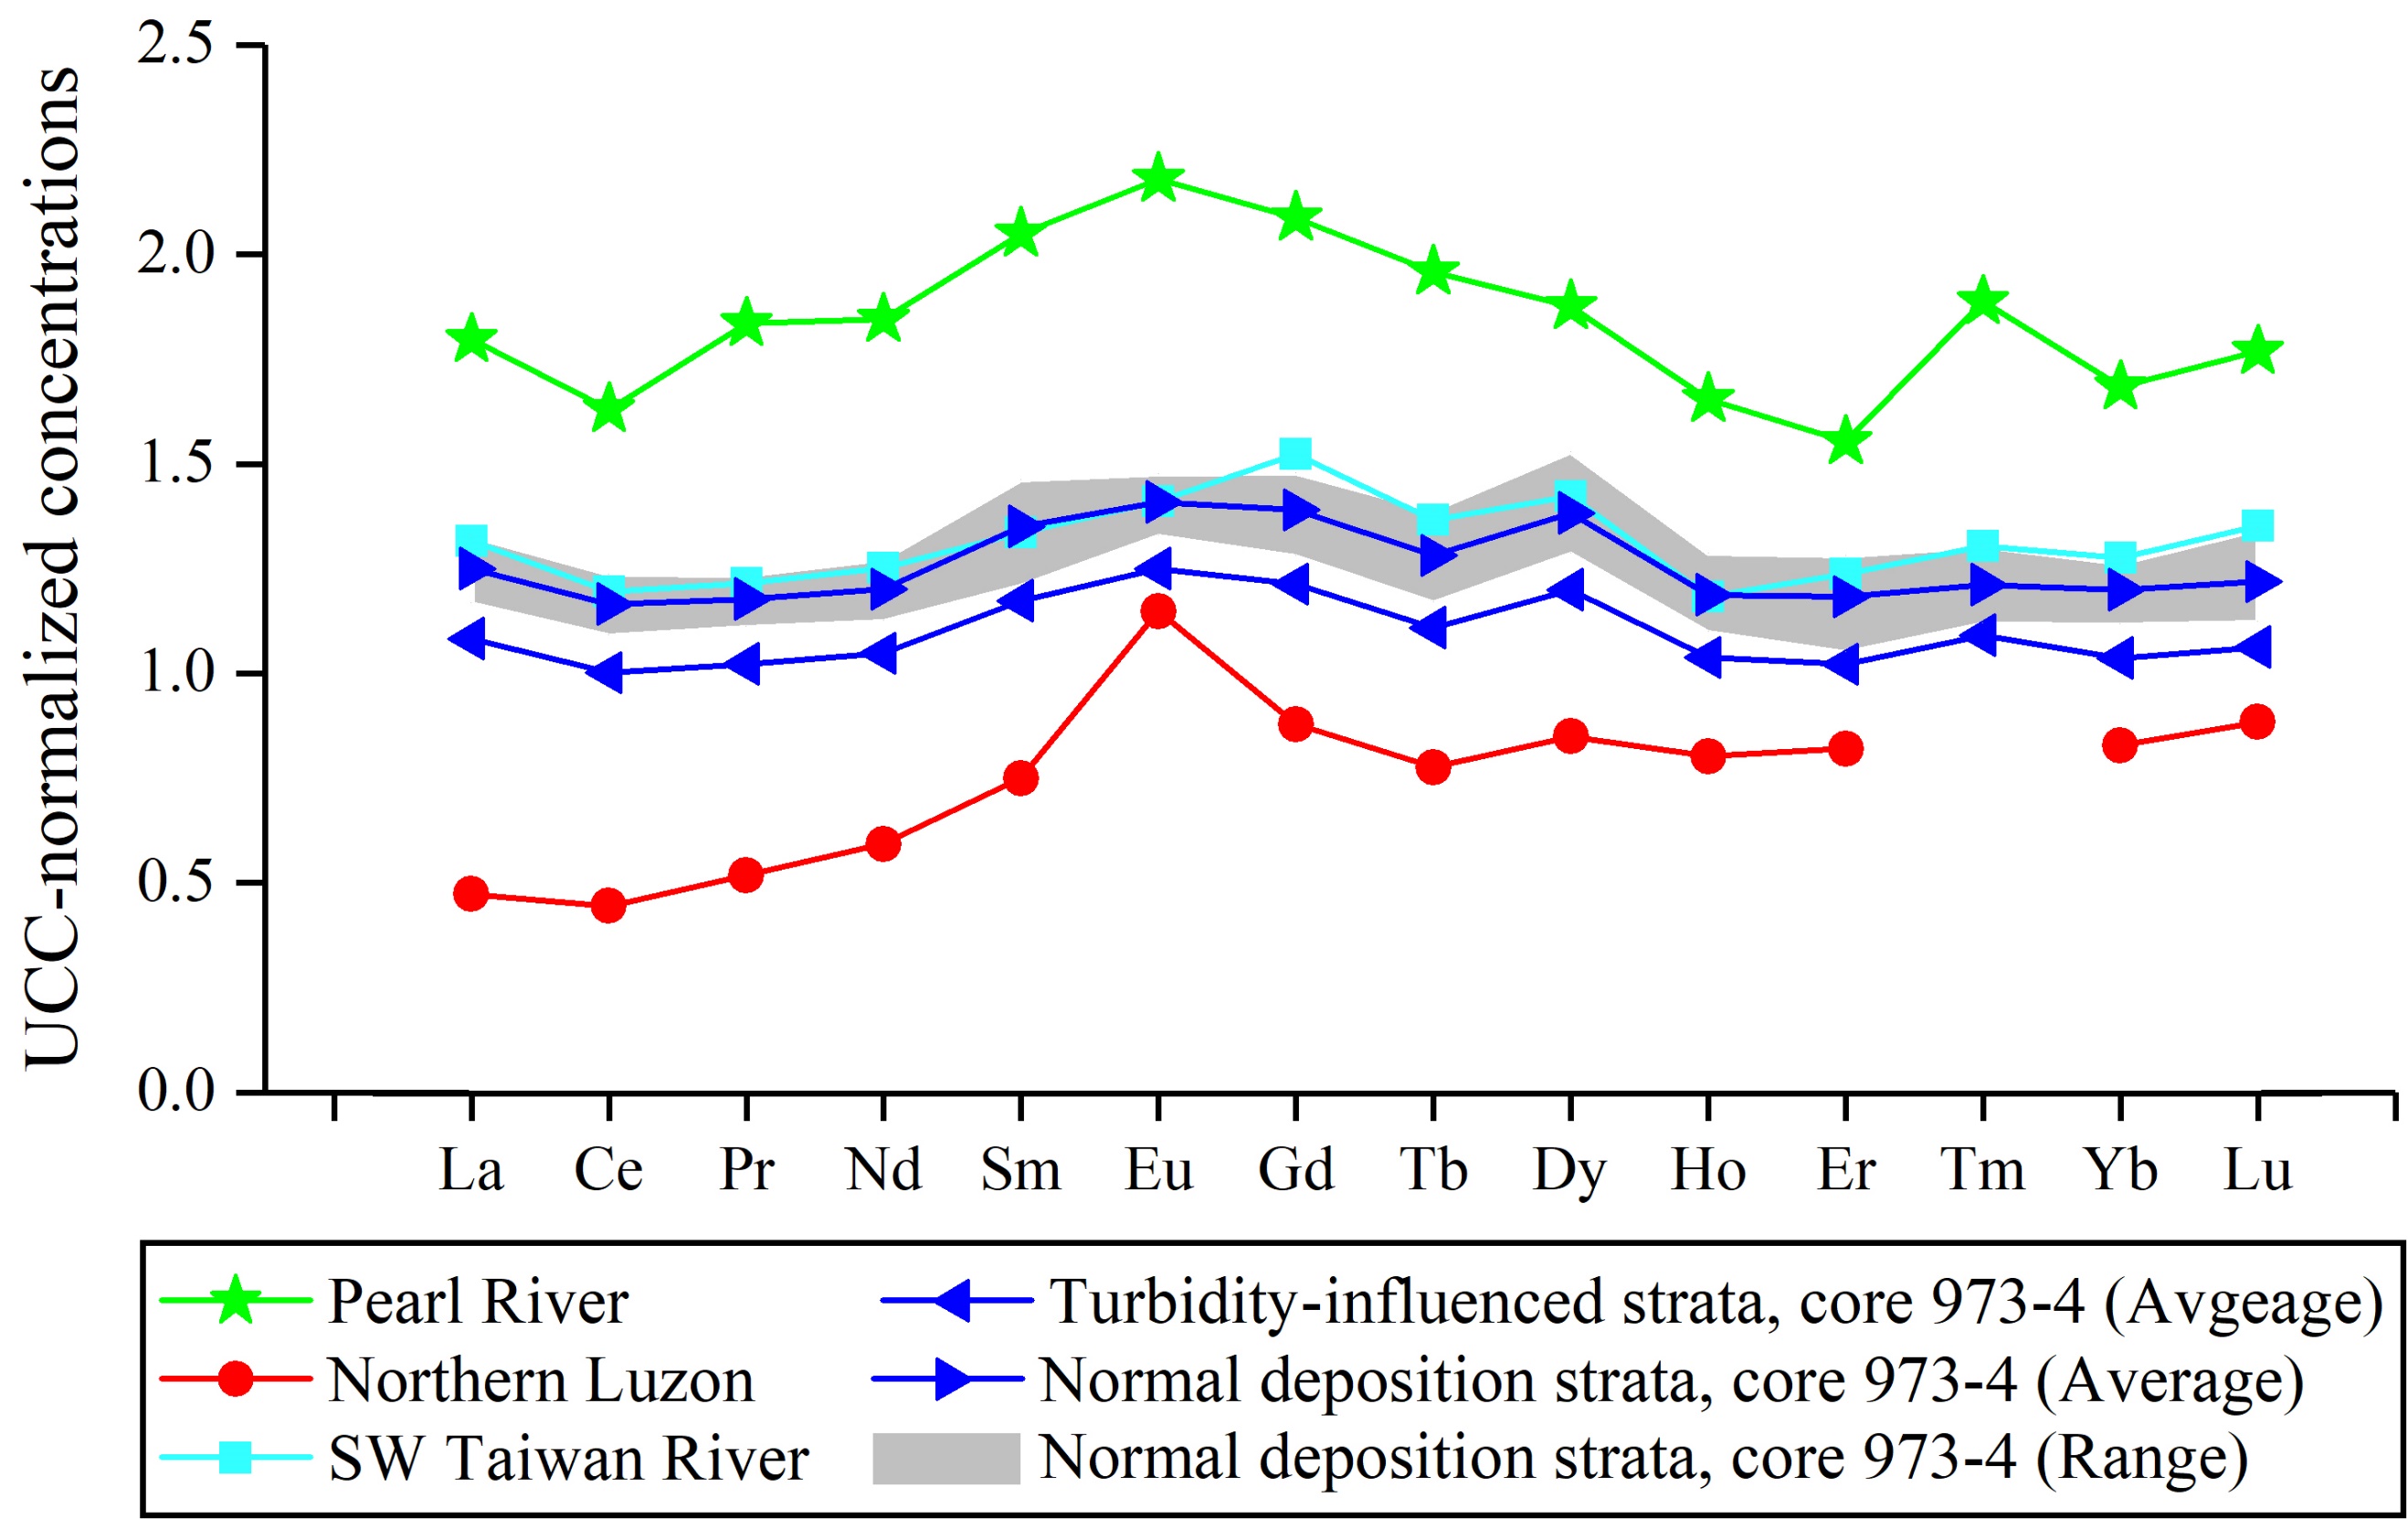 |
| --- |
| | **Supplementary Fig.S1** UCC-normalized REE patterns of sediments from core 973-4 over the past 42 kyr (date from Wu, 2017), the grey stripe represents the range of REE concentrations of normal deposition strata (Unit 1, Unit 2 and Unit 4) except for the Unit 3, the two blue lines decorated with left-directed and right-directed triangles represent the mean concentrations of turbidite-influenced strata (Unit 3) and normal deposition strata (Unit 1, Unit 2 and Unit 4), respectively. Potential sources of sediments from Northern Luzon (Marini et al., 2005), Pearl River (Xu and Han, 2009) and SW Taiwan Rivers (Li et al., 2013) are exhibited for comparison. | | --- | |

| 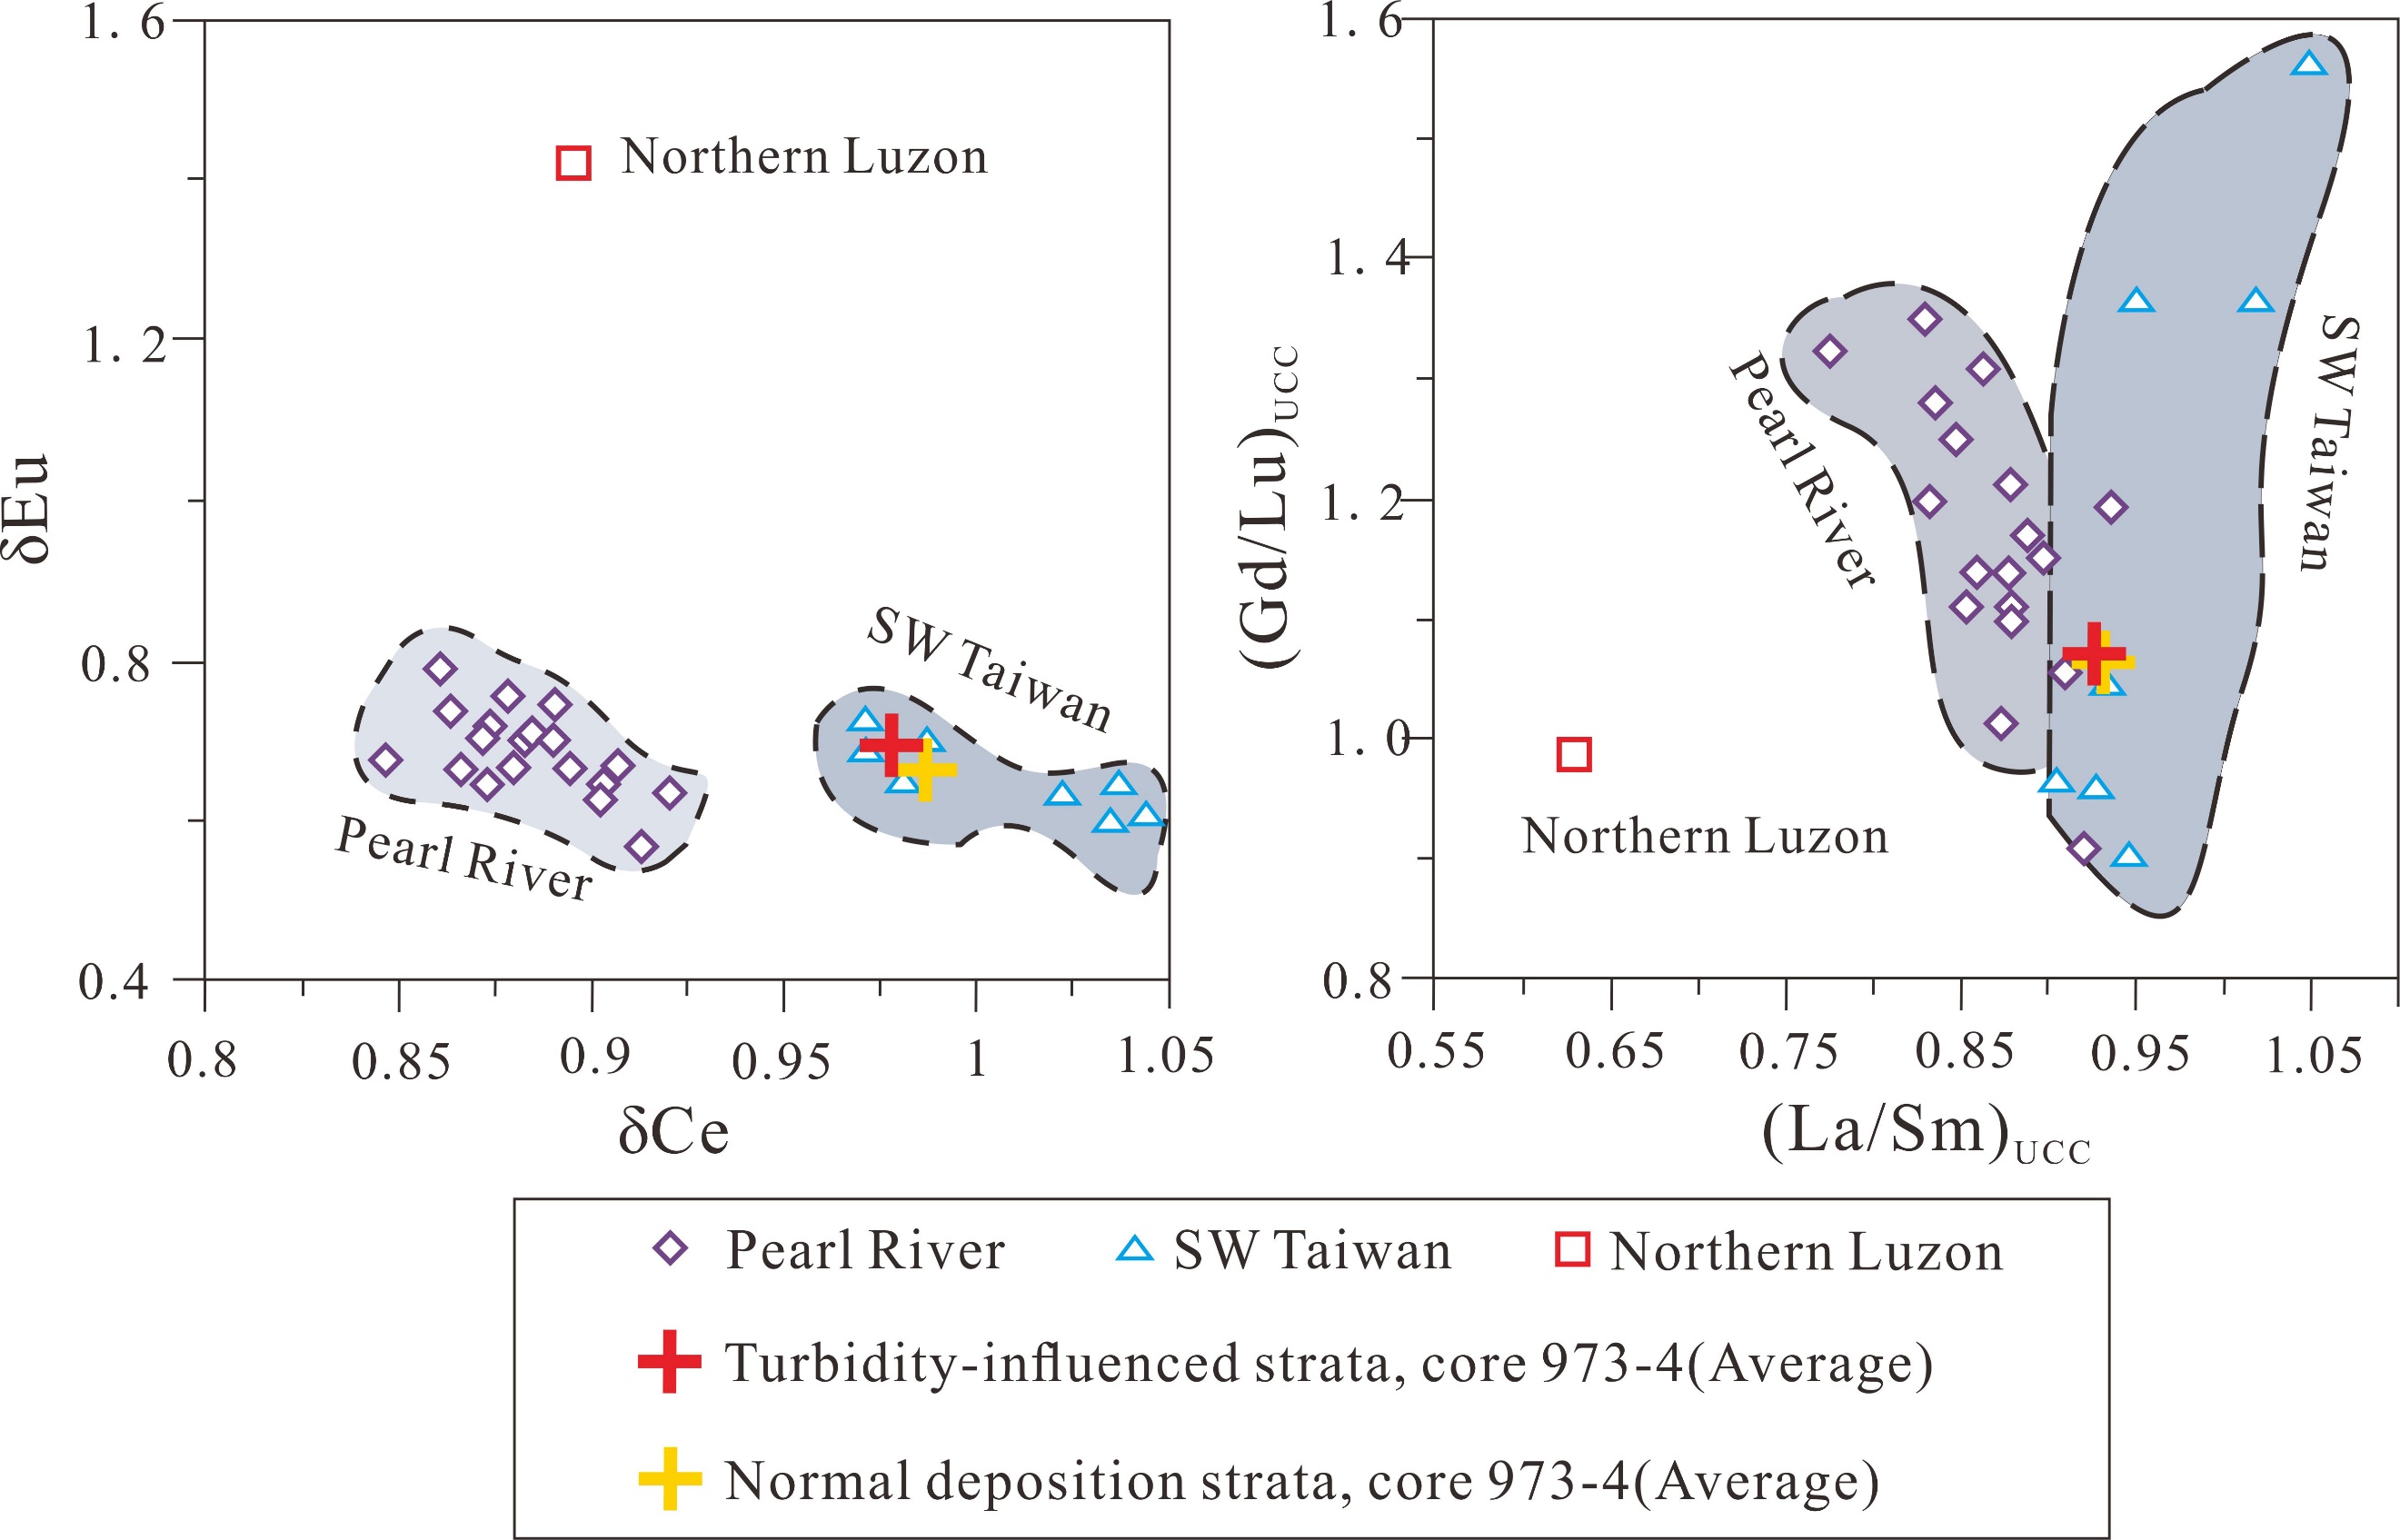 |
| --- |
| **Supplementary Fig.S2** Discrimination plots between δEu vs. δCe and (Gd/Lu)UCC vs. (La/Sm)UCC for core 973-4 sediments since 42 kyr (date from Wu, 2017), the red and yellow cross represent the mean values of turbidite-influenced strata (Unit 3) and normal deposition strata (Unit 1, Unit 2 and Unit 4), respectively. The mean value is available because the standard deviation of data δEu, δCe, (Gd/Lu)UCC and (La/Sm)UCC is less than 1%. Surrounding samples are displayed for comparison, including SW Taiwan Rivers (Li et al., 2013), Pearl River (Xu and Han, 2009) and Northern Luzon (Marini et al., 2005). |
